# Supplementary material for: Vertically stacked nanocellulose tactile sensor
Source: Royal Society of Chemistry journal article supplement (doi:10.1039/c7nr03685j), 2017-01-01
Supplement: c7nr03685j1.pdf [file c7nr03685j1.pdf]

## **Supplementary Information**

### **Vertically Stacked Nanocellulose Tactile Sensor**

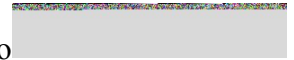

## **Table of Contents**

**S1. Fabrication process of tactile sensor with ink-jet printer**

**S2. Real image of cellulose substrate with micro-pyramid structure**

**S3. Low voltage driving characteristics of pressure sensors**

## S1. Fabrication process of tactile sensor with ink-jet printer

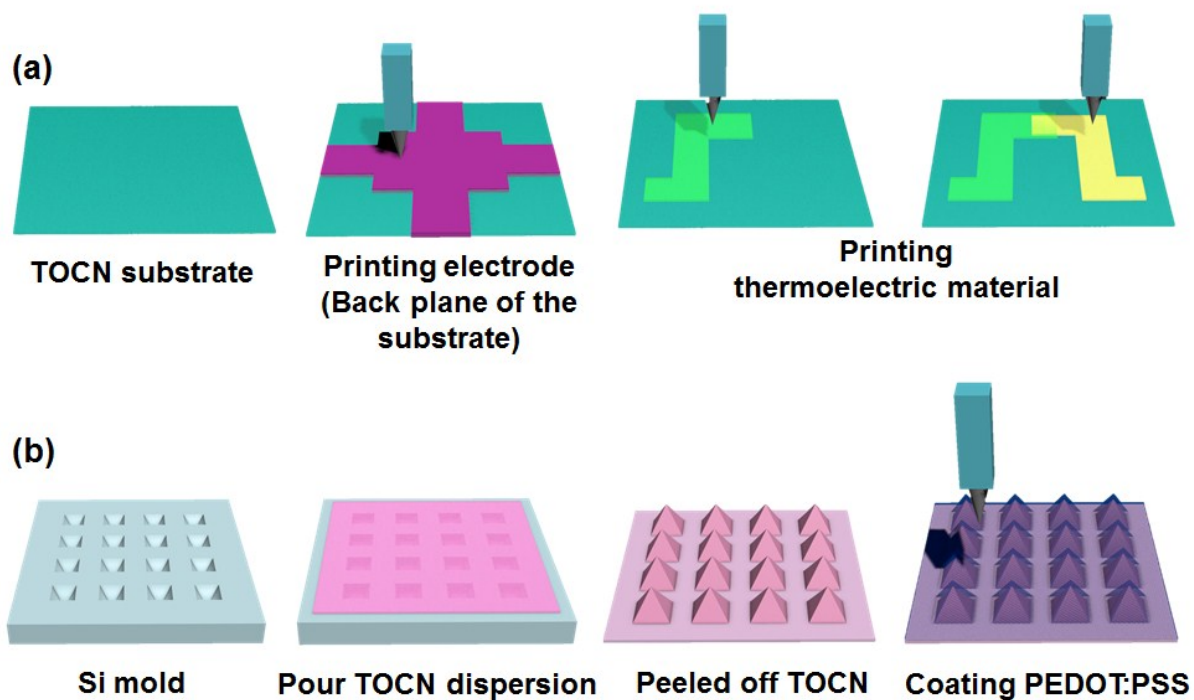

**Figure S1. Fabrication process illustration of tactile sensor using ink-jet printing method.** Fabrication process of (a) temperature sensor using the printing method (upper layer) and (b) pressure sensor (lower layer) with nano-cellulose substrate.

## S2. Real image of cellulose substrate with micro-pyramid structure

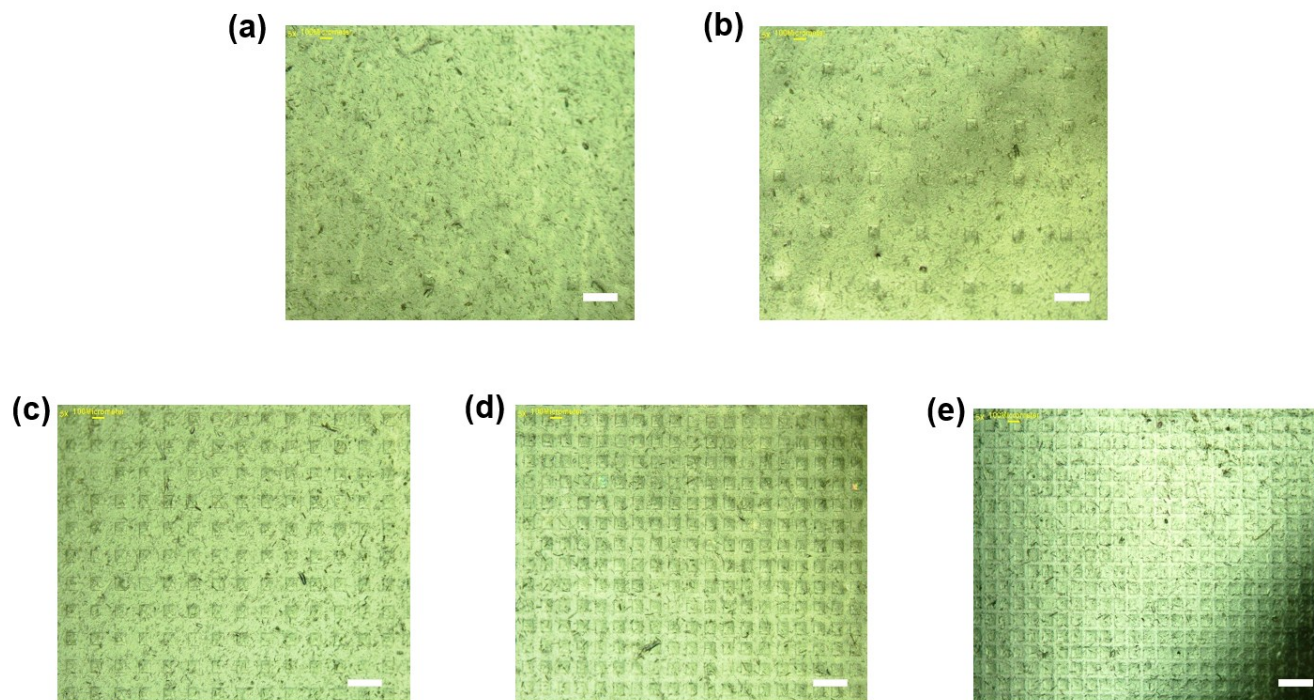

**Figure S2. Optical images of nano-cellulose pyramid patterns.** Pyramid patterns with the same pattern size (100  $\mu\text{m}$ ) with different pattern space of (a) 500, (b) 300, (c) 100, (d) 50 and (e) 20  $\mu\text{m}$ . Scale bar is 200  $\mu\text{m}$ .

### S3. Low voltage driving characteristics of pressure sensors

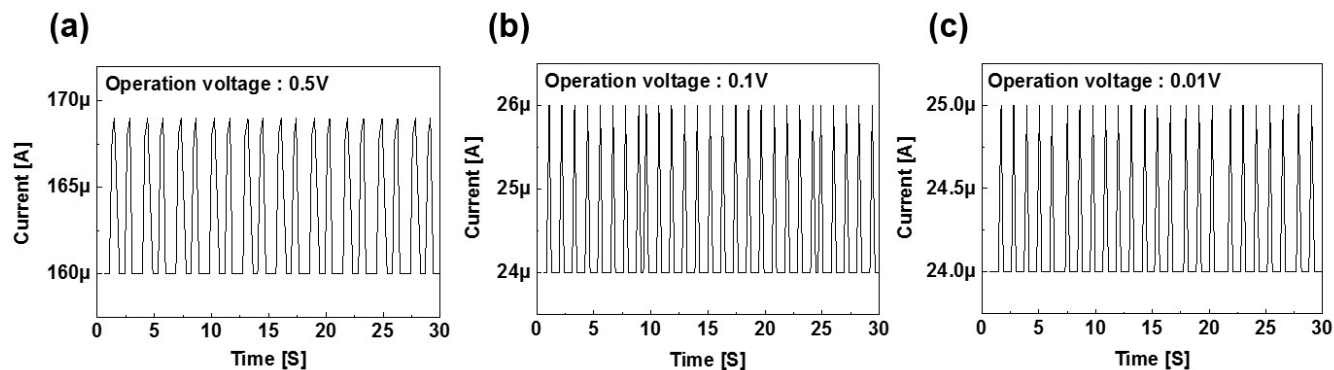

**Figure S3. Current characteristics of nano-cellulose based pressure sensor under low operation voltage.** A clear current change is seen for the applied voltage at low operating voltage, (a) 0.5V, (b) 100mV, (c) 10mV. The performance of a pressure sensor that works well under low operating conditions can be confirmed.
